# Supplementary material for: Synthesis, characterization and evaluation of diglycidyl-1,2-cyclohexanedicarboxylate crosslinked polyethylenimine nanoparticles as efficient carriers of DNA
Source: Royal Society of Chemistry journal article supplement (doi:10.1039/c5nj02953h), 2016-01-01
Supplement: c5nj02953h1.pdf [file c5nj02953h1.pdf]

## SUPPLEMENTARY INFORMATION

### Synthesis, characterization and evaluation of diglycidyl-1,2-cyclohexanedicarboxylate crosslinked polyethylenimine nanoparticles as efficient carrier of DNA

Ruby Bansal, Pallavi Kiran and Pradeep Kumar\*

Nucleic Acids Research Laboratory, CSIR-Institute of Genomics and Integrative Biology, Delhi University Campus, Mall Road, Delhi – 110 007, India

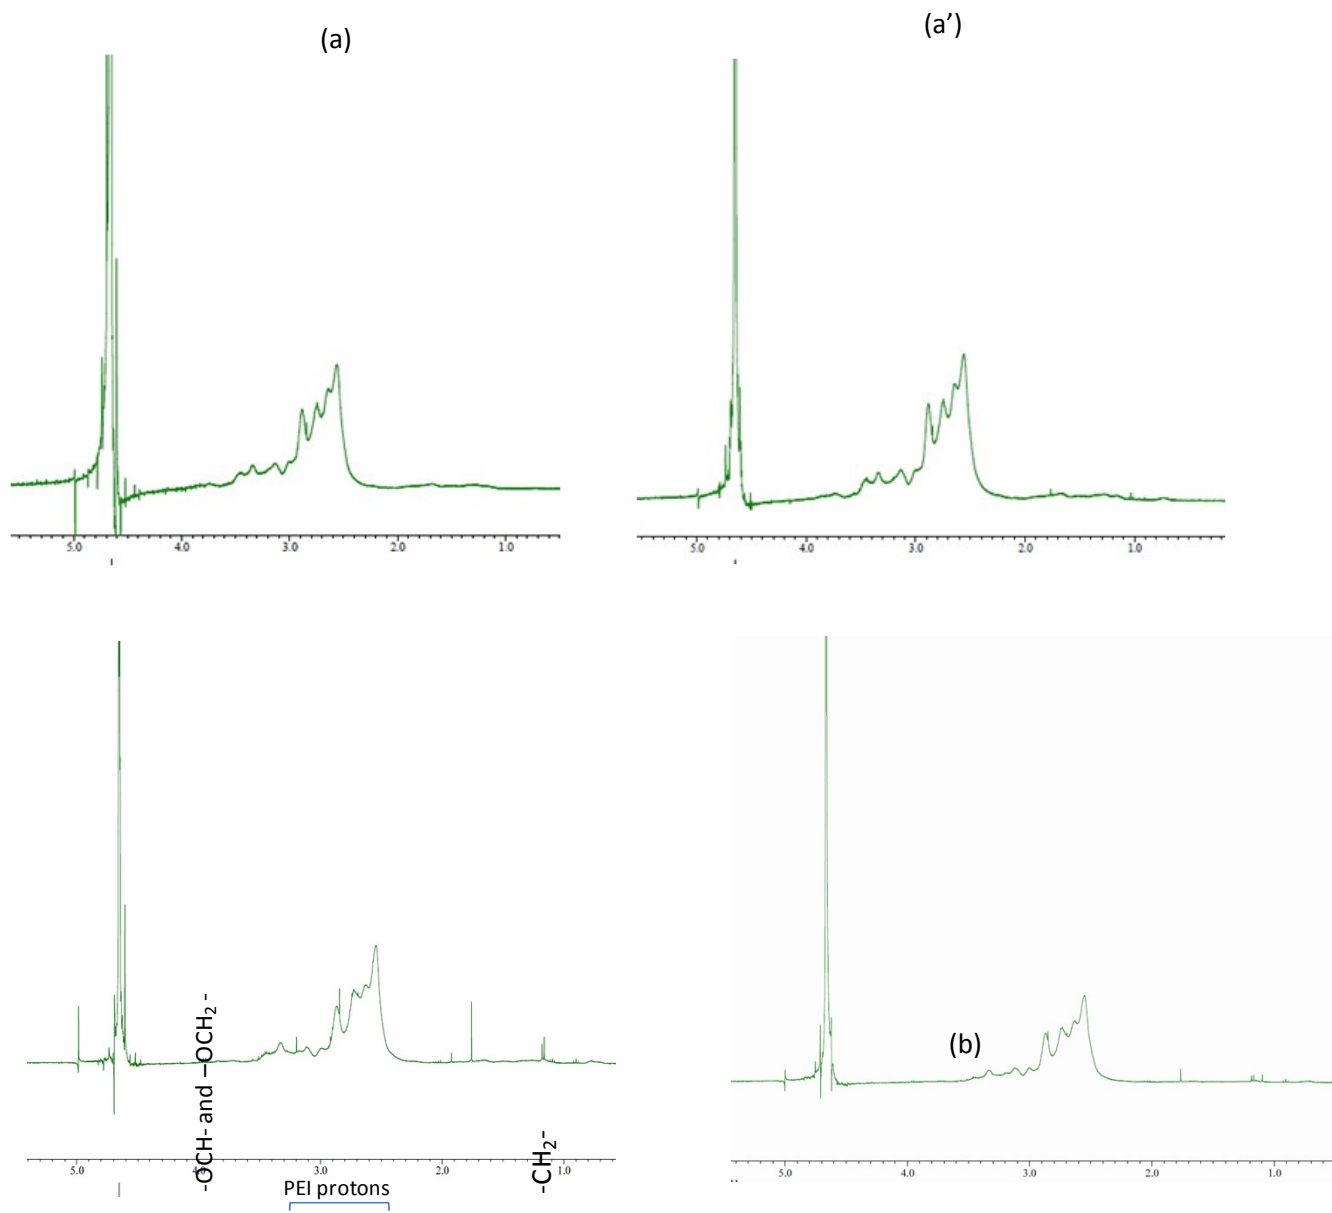

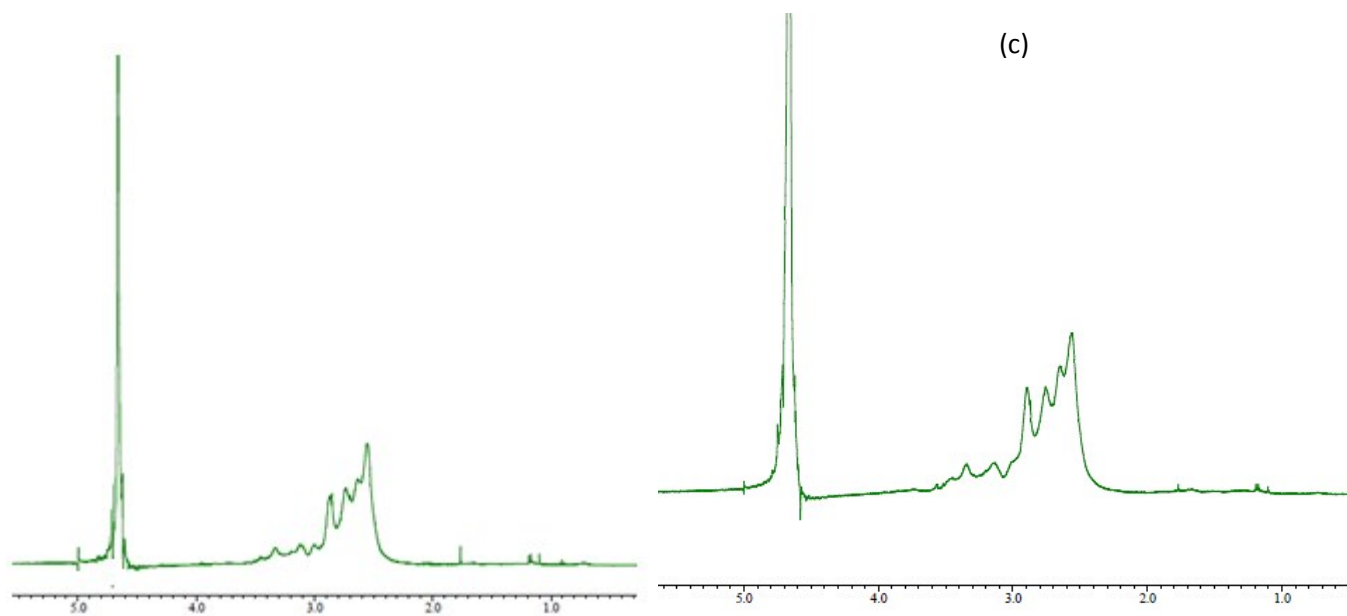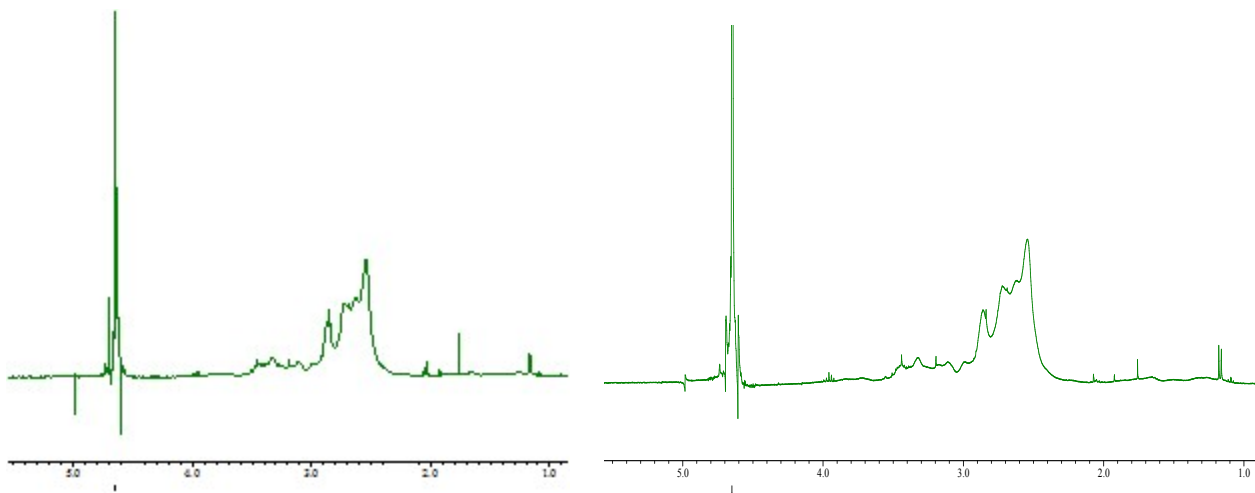

Figure S1.  $^1\text{H}$ -NMR spectra of (a-d)  $\text{DP}_{10}$  NPs, and (a'-d')  $\text{DP}_{25}$  NPs in  $\text{D}_2\text{O}$ .
